## Correction

# Correction: Squalene Synthase As a Target for Chagas Disease Therapeutics

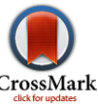

## The PLOS Pathogens Staff

The affiliation for the authors Na Shang, Qian Li, and Tzu-Ping Ko are incorrect. Na Shang and Qian Li are affiliated only with Tianjin Institute of Industrial Biotechnology, Chinese Academy of Sciences, Tianjin, China. Tzu-Ping Ko is affiliated only with the Institute of Biological Chemistry, Academia Sinica, Taipei, Taiwan.

## Reference

1. Shang N, Li Q, Ko T-P, Chan H-C, Li J, et al. (2014) Squalene Synthase As a Target for Chagas Disease Therapeutics. PLoS Pathog 10(5): e1004114. doi:10.1371/journal.ppat.1004114

---

**Citation:** The PLOS Pathogens Staff (2014) Correction: Squalene Synthase As a Target for Chagas Disease Therapeutics. PLoS Pathog 10(6): e1004239. doi:10.1371/journal.ppat.1004239

**Published:** June 10, 2014

**Copyright:** © 2014 The PLOS Pathogens Staff. This is an open-access article distributed under the terms of the Creative Commons Attribution License, which permits unrestricted use, distribution, and reproduction in any medium, provided the original author and source are credited.
